# Supplementary material for: AfLaeA, a Global Regulator of Mycelial Growth, Chlamydospore Production, Pathogenicity, Secondary Metabolism, and Energy Metabolism in the Nematode-Trapping Fungus Arthrobotrys flagrans
Source: PubMed Central journal article supplement (PMC10434191; doi:10.1128/spectrum.00186-23), 2023-06-26
Supplement: spectrum.00186-23-s0001.pdf [file spectrum.00186-23-s0001.pdf]

## Supplementary materials for

*AfLaeA*, a Global Regulator of Mycelial Growth, Chlamydospore Production, Pathogenicity, Secondary Metabolism, and Energy Metabolism in the Nematode-Trapping Fungus *Arthrobotrys flagrans*

Yu Zhang, Xin Wang, Yuan Ran, Ke-Qin Zhang, Guo-Hong Li\*

State key Laboratory for Conservation and Utilization of Bio-Resources in Yunnan, School of Life Sciences, Yunnan University, Kunming, Yunnan 650091, China.

\*Correspondence and requests for materials should be addressed to Guo-Hong Li ([ligh@ynu.edu.cn](mailto:ligh@ynu.edu.cn)).

## **Content**

1. Figure S1-S10.
2. Table S1-S9

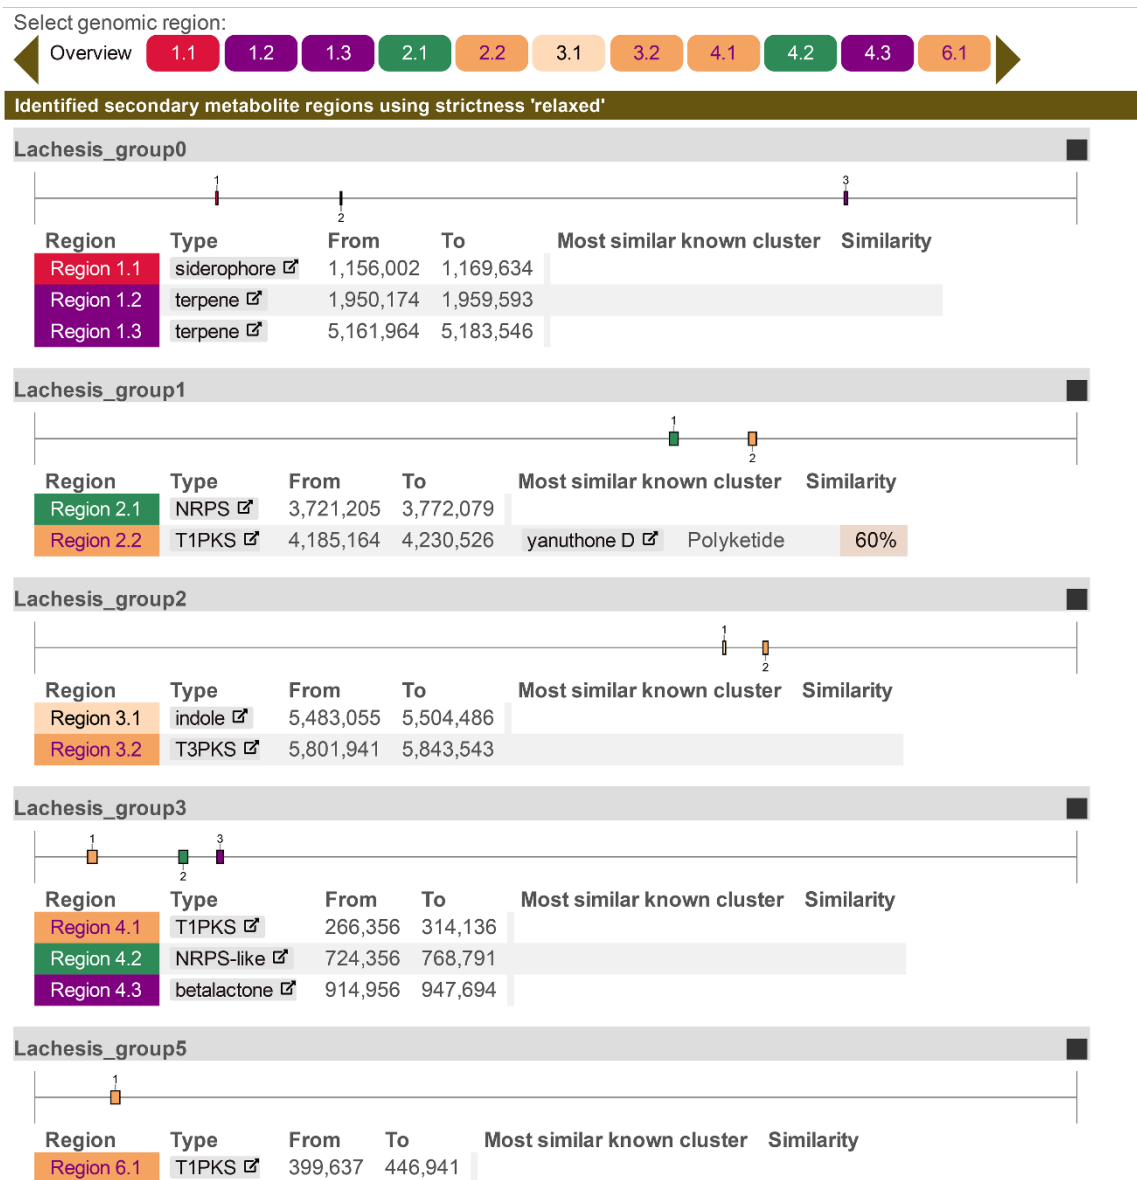

**Figure S1** Prediction of secondary metabolites gene clusters in *A. flagrans*.

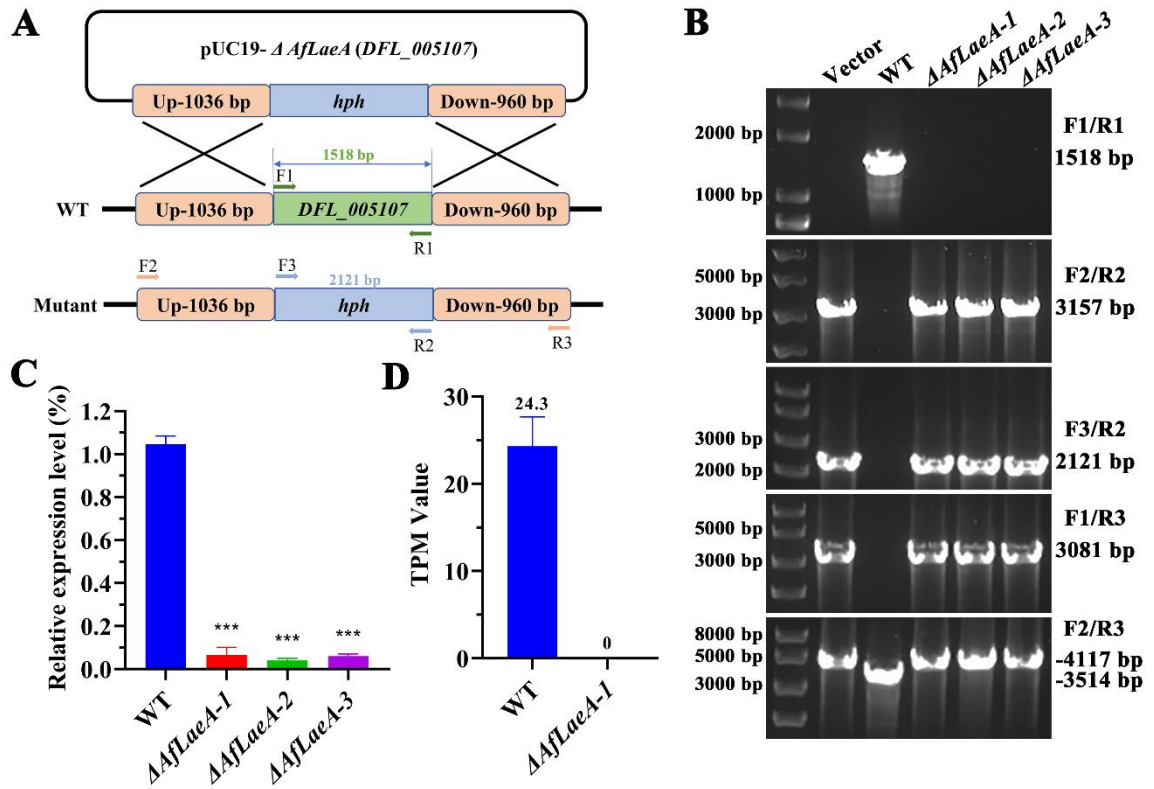

**Figure S2** Disruption of *AfLaeA* gene in *A. flagrans*.

A, Diagram of the knockout pattern of the *AfLaeA* gene.

B, Detection of the knockout results of *AfLaeA* gene.

C, Detection of the relative expression levels of *AfLaeA* gene in  $\Delta AfLaeA$  strains by qPCR.

D, Transcriptome data were used to confirm the expression level *AfLaeA* gene in WT and  $\Delta AfLaeA$  strains.

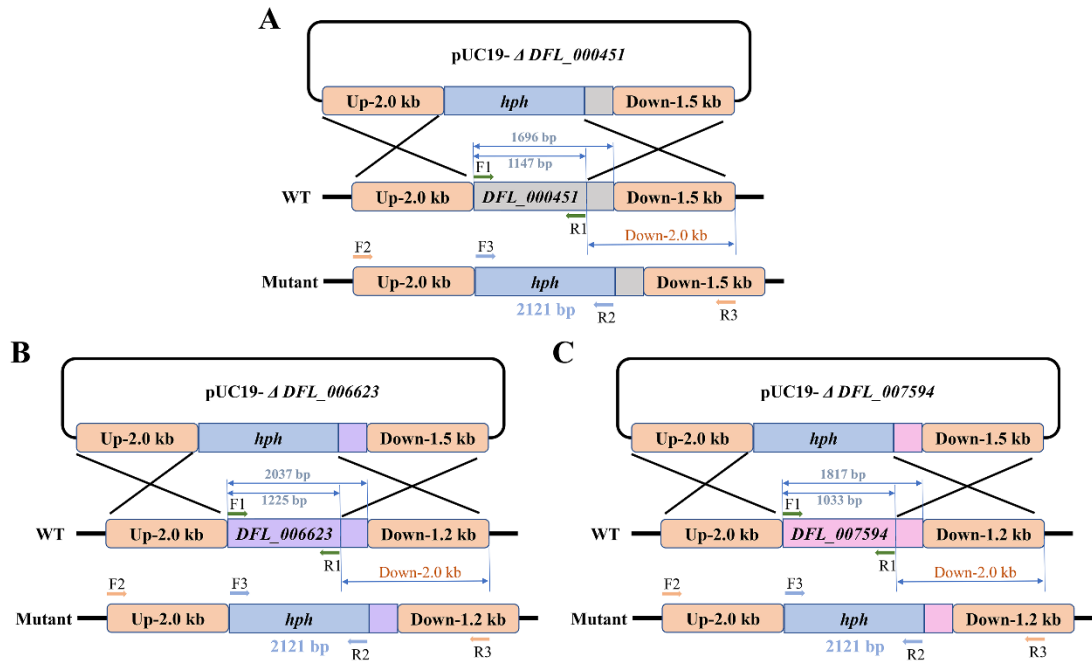

**Figure S3** Disruption of three methyltransferases (*DFL\_000451*, *DFL\_006623*, and *DFL\_007594*).

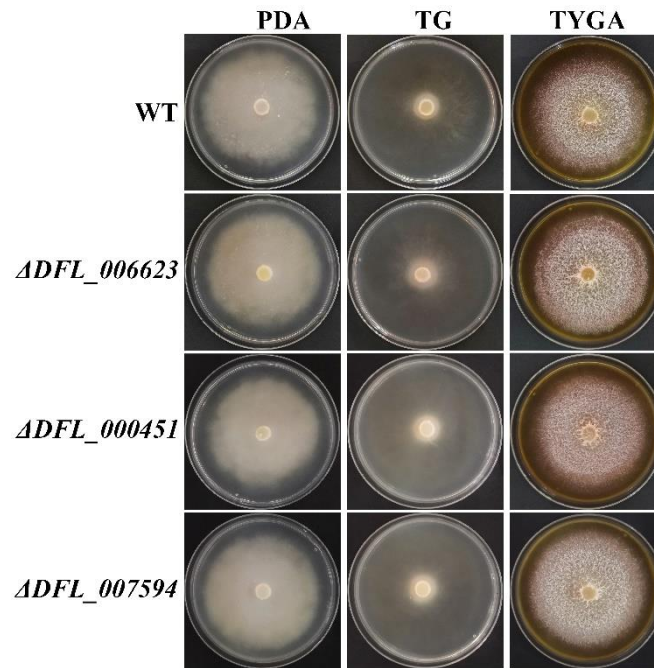

**Figure S4** Analysis of the effects of three methyltransferase on mycelium growth. The knock-out strains of *DFL\_000451*, *DFL\_006623* and, *DFL\_007594* genes were cultured with PDA, TG and, TYGA medium at 28°C for 5 days, respectively.

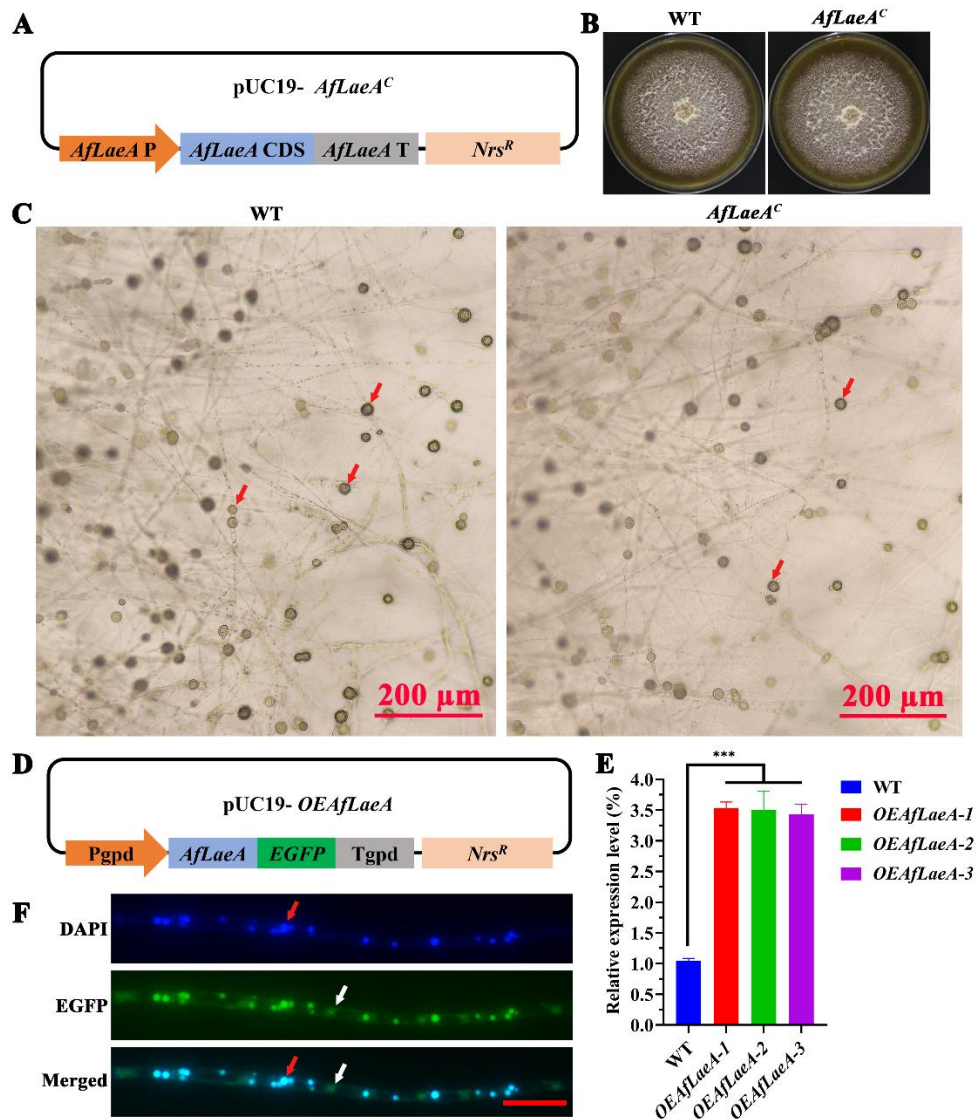

**Figure S5** Complementation and overexpression of *AfLaeA* gene in the  $\Delta AfLaeA$ , and WT strain, respectively.

A, Diagram of the complementation pattern of the *AfLaeA* gene by natural promoter in the  $\Delta AfLaeA$  strain.

B, Growth of *A. flagrans* WT, and the complemented strains on TYGA after 7 days.

C, Overview of chlamydospores of the WT and the complemented strains. The red arrows indicate chlamydospores.

D, Diagram of the overexpression pattern of the *AfLaeA* gene.

E, Detection of the relative expression levels of *AfLaeA* gene in *OEAfLaeA* strains by qPCR.

F, Observation of the localization of *AfLaeA* in cells by GFP fluorescence. Scale bars, 5  $\mu$ m.

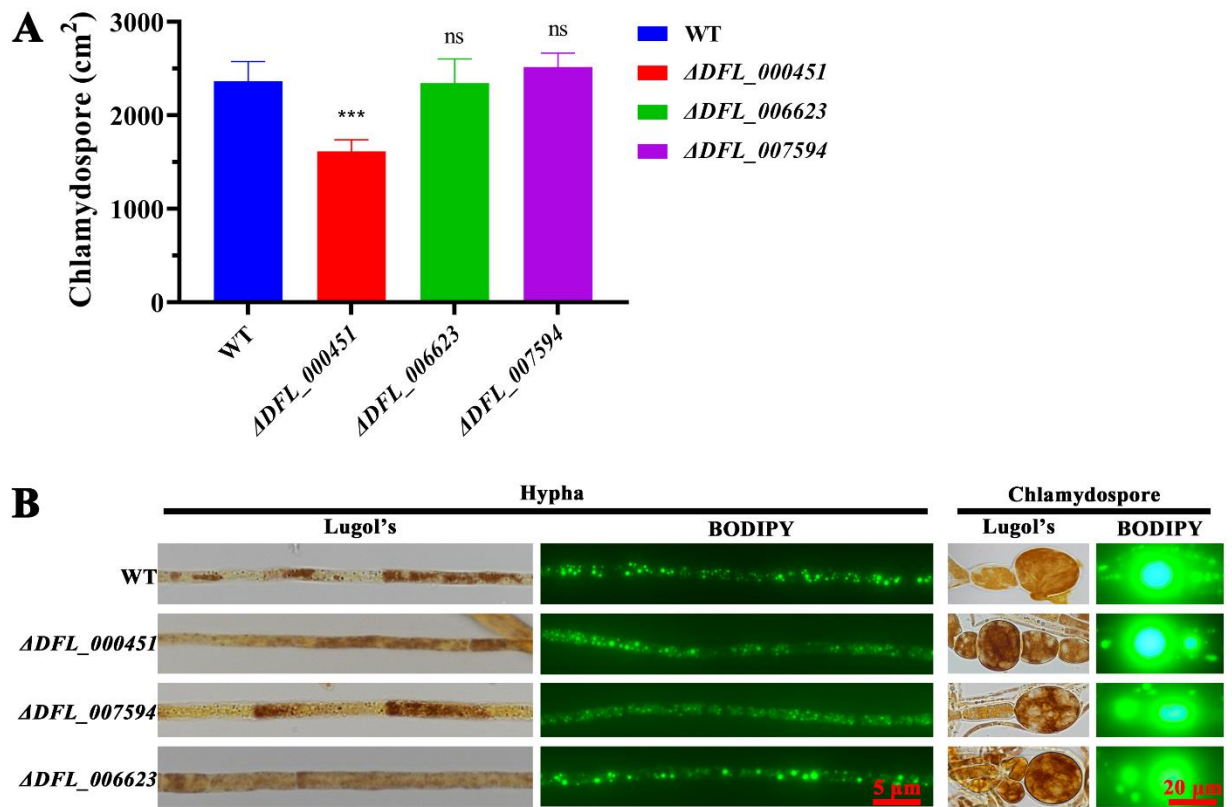

**Figure S6** Analysis of the effects of *DFL\_000451*, *DFL\_006623* and *DFL\_007594* genes on chlamydospore, lipid droplets and glycogen production.

A, Comparison of the number of chlamydospores between WT strain and  $\Delta DFL_{000451}$ ,  $\Delta DFL_{006623}$ . and  $\Delta DFL_{007594}$  strains (ns  $P > 0.05$ , \* $P < 0.05$ , \*\* $P < 0.01$ , \*\*\* $P < 0.001$ ).

B, Analysis of glycogen and LDs in  $\Delta DFL_{000451}$ ,  $\Delta DFL_{006623}$ . and  $\Delta DFL_{007594}$  strains.



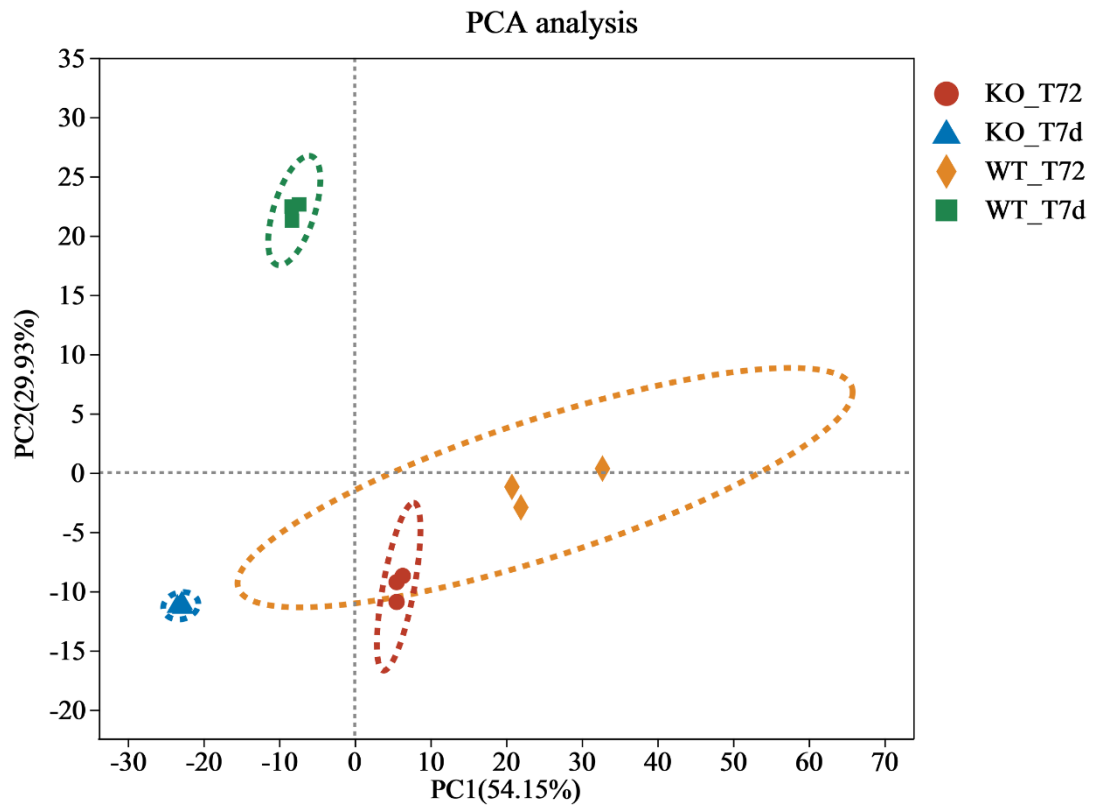

**Figure S7** PCA analysis among samples. KO\_T72 and WT\_T72 represent the *AfLaeA* and WT strains were cultured for 3 days in TYGA medium, respectively. KO\_T7d and WT\_T7d represent the *AfLaeA* and WT strains were cultured for 7 days in TYGA medium, respectively.

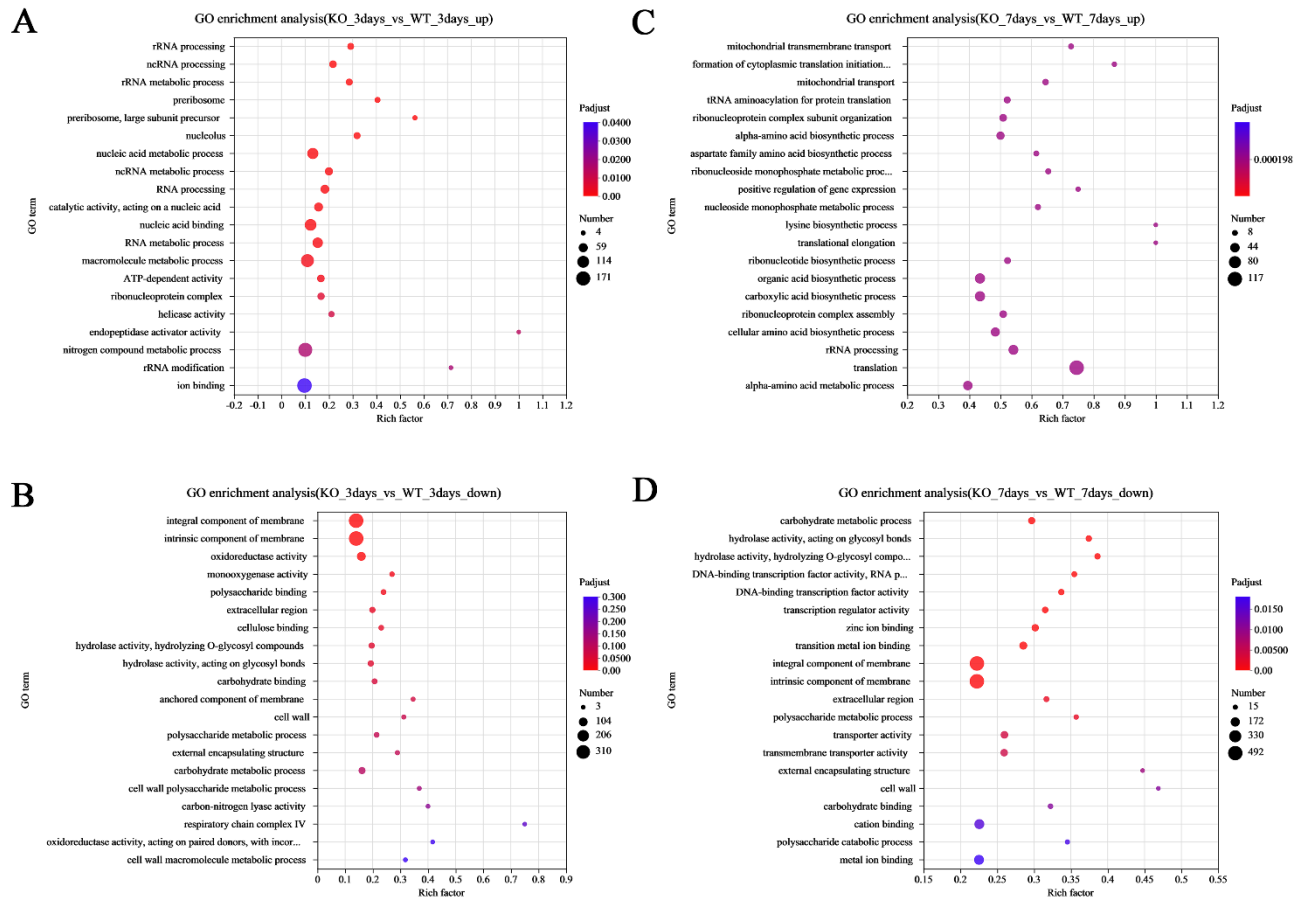

**Figure S8** Gene Ontology (GO) enrichment analysis of the DEGs.

A and B, GO enrichment analysis of the upregulated and downregulated DEGs in the *AfLaeA* versus WT strain at 3 days.

C and D, GO enrichment analysis of the upregulated and downregulated DEGs in the *AfLaeA* versus WT strain at 7 days.

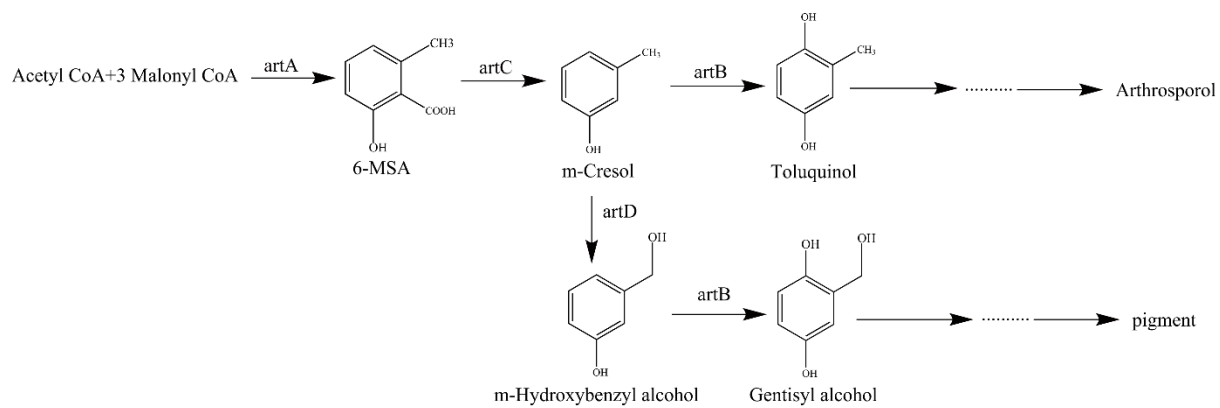

**Figure S9** Proposed pathway for the biosynthesis of 6-MSA in *A. flagrans* and *A. oligospora* (1).

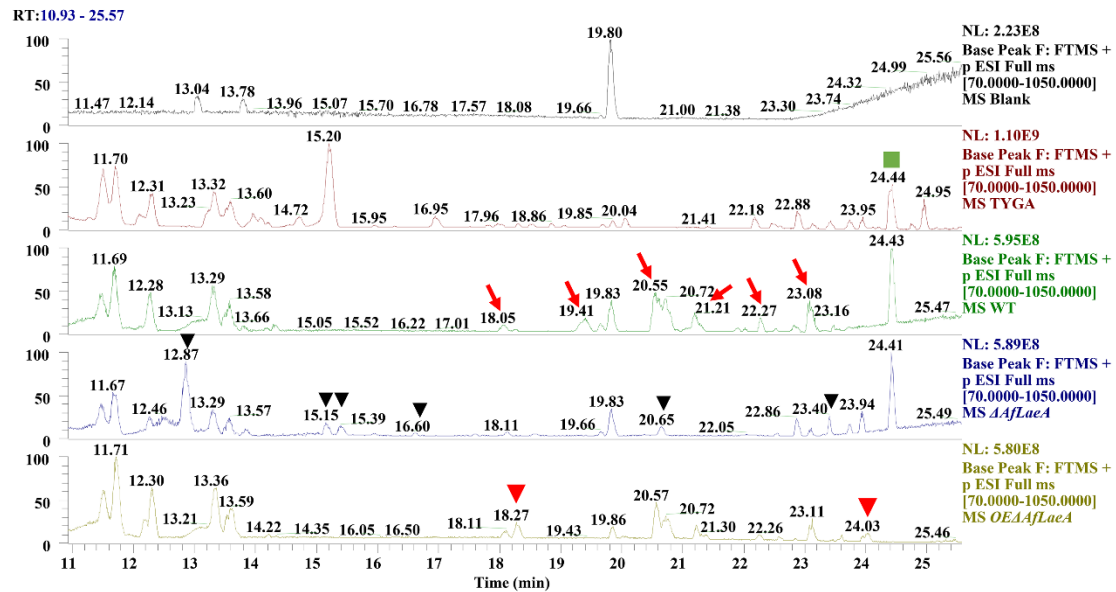

**Figure S10** Comparative analysis of the metabolic profile of WT,  $\Delta AfLaeA$ , and  $OEAfLaeA$  strains cultured in TYGA medium for 14 days by LC-MS. The red arrow indicated the missing components (at  $m/z$  279.2309, 321.2392, 161.0596, and 303.2292 with retention times of 20.55, 21.21, 22.27, and 23.08 min, respectively) of  $\Delta AfLaeA$  strain compared with WT strain. The black and red inverted triangles indicate the newly produced components (at  $m/z$  130.0652, 511.2546, 130.0652, 494.2030, 279.2316, and 379.3354 with retention times of 12.87, 15.15, 15.39, 16.60, 20.65, and 23.40 min, respectively) of  $\Delta AfLaeA$ , and  $OEAfLaeA$  strains, respectively. Green squares indicate the components with peak time of 24.44 min in TYGA medium, and cannot be used by WT and  $\Delta AfLaeA$  strains.

Table S1 Analysis of the secondary metabolic gene clusters in *A. flagrans*.

| #Gene_cluster | scaffold_id     | Start   | End     | Length(bp) |
|---------------|-----------------|---------|---------|------------|
| r1c1          | Lachesis_group0 | 1156002 | 1169634 | 13633      |
| r1c2          | Lachesis_group0 | 1950174 | 1959593 | 9420       |
| r1c3          | Lachesis_group0 | 5161964 | 5183546 | 21583      |
| r2c1          | Lachesis_group1 | 3721205 | 3772079 | 50875      |
| r2c2          | Lachesis_group1 | 4185164 | 4230526 | 45363      |
| r3c1          | Lachesis_group2 | 5483055 | 5504486 | 21432      |
| r3c2          | Lachesis_group2 | 5801941 | 5843543 | 41603      |
| r4c1          | Lachesis_group3 | 266356  | 314136  | 47781      |
| r4c2          | Lachesis_group3 | 724356  | 768791  | 44436      |
| r4c3          | Lachesis_group3 | 914956  | 947694  | 32739      |
| r6c1          | Lachesis_group5 | 399637  | 446941  | 47305      |

Table S2 Comparison of the conserved domain of methyltransferase between *A. nidulans* and *A. flagrans* by NCBI online tool Conserved Domain Search Service.

| Protein                |                                          |                              |                              |                              | Domain Name     | Description                                                                                         |
|------------------------|------------------------------------------|------------------------------|------------------------------|------------------------------|-----------------|-----------------------------------------------------------------------------------------------------|
| AnLaeA<br>(AAQ95166.1) | AfLaeA<br>(DFL_005107)<br>(EVM02G003030) | DFL_000451<br>(EVM05G004610) | DFL_006623<br>(EVM03G001000) | DFL_007594<br>(EVM03G010660) |                 |                                                                                                     |
| ◆                      | ●                                        | ▲                            | ★                            | ■                            | Methyltransf_25 | Methyltransferase domain                                                                            |
| ◆                      | ●                                        | ▲                            | ★                            | ■                            | Methyltransf_23 | Methyltransferase domain                                                                            |
| ◆                      | ●                                        | ▲                            | ★                            | ■                            | AdoMet_MTases   | S-adenosylmethionine-dependent methyltransferases                                                   |
| ◆                      | ●                                        | ▲                            |                              | ■                            | Methyltransf_12 | Methyltransferase domain                                                                            |
| ◆                      | ●                                        | ▲                            | ★                            | ■                            | Methyltransf_11 | Methyltransferase domain                                                                            |
|                        | ●                                        | ▲                            | ★                            | ■                            | PLN02336        | phosphoethanolamine N-methyltransferase                                                             |
| ◆                      | ●                                        | ▲                            | ★                            | ■                            | HemK            | Methylase of polypeptide chain release factors                                                      |
| ◆                      | ●                                        | ▲                            | ★                            | ■                            | Methyltransf_31 | Methyltransferase domain                                                                            |
|                        | ●                                        |                              |                              | ■                            | Cfa             | Cyclopropane fatty-acyl-phospholipid synthase and related methyltransferases                        |
|                        | ●                                        |                              | ★                            |                              | PRK09328        | N5-glutamine S-adenosyl-L-methionine-dependent methyltransferase                                    |
| ◆                      | ●                                        | ▲                            | ★                            | ■                            | UbiE            | Ubiquinone/menaquinone biosynthesis C-methylase                                                     |
|                        | ●                                        | ▲                            | ★                            | ■                            | BioC            | malonyl-acyl carrier protein O-methyltransferase                                                    |
|                        | ●                                        |                              |                              | ■                            | PRK14968        | putative methyltransferase                                                                          |
| ◆                      | ●                                        | ▲                            | ★                            | ■                            | TrmN6           | tRNA1(Val) A37 N6-methylase                                                                         |
|                        | ●                                        | ▲                            |                              | ■                            | ubiE            | bifunctional demethylmenaquinone methyltransferase/2-methoxy-6-polyprenyl-1,4-benzoquinol methylase |
|                        | ●                                        |                              | ★                            | ■                            | hemK_fam        | HemK family putative methylases                                                                     |
|                        | ●                                        | ▲                            | ★                            |                              | MenG_MenH_UbiE  | ubiquinone/menaquinone biosynthesis methyltransferases                                              |

|   |   |   |   |   |                     |                                                                                            |
|---|---|---|---|---|---------------------|--------------------------------------------------------------------------------------------|
|   | • |   |   |   | Methyltransf<br>_16 | Lysine methyltransferase                                                                   |
|   | • |   |   |   | PRK01544            | bifunctional N5-glutamine S-adenosyl-L-methionine-dependent methyltransferase/tRNA (m7G46) |
| ◆ | • |   |   | ■ | MTS                 | Methyltransferase small domain                                                             |
|   |   | ▲ | ★ | ■ | Tam                 | Trans-aconitate methyltransferase                                                          |
|   |   | ▲ | ★ | ■ | Ubie_methyl<br>tran | ubiE/COQ5 methyltransferase family                                                         |
|   |   | ▲ |   |   | PLN02244            | tocopherol O-methyltransferase                                                             |
|   |   | ▲ | ★ | ■ | SmtA                | SAM-dependent methyltransferase                                                            |
|   |   | ▲ |   |   | PTZ00098            | phosphoethanolamine N-methyltransferase                                                    |
| ◆ |   | ▲ |   | ■ | PRK09328            | N5-glutamine S-adenosyl-L-methionine-dependent methyltransferase                           |
|   |   |   | ★ |   | PLN02490            | MPBQ/MSBQ methyltransferase                                                                |
|   |   |   | ★ |   | CMAS                | Mycolic acid cyclopropane synthetase                                                       |
|   |   |   | ★ | ■ | PRK07580            | Mg-protoporphyrin IX methyl transferase                                                    |
|   |   |   | ★ |   | PKS_MT              | Methyltransferase in polyketide synthase (PKS) enzymes                                     |
|   |   |   | ★ |   | PRK01683            | trans-aconitate 2-methyltransferase                                                        |
|   |   |   |   | ■ | YrrM                | Predicted O-methyltransferase YrrM                                                         |
| ◆ |   |   |   | ■ | RsmC                | 16S rRNA G1207 methylase RsmC                                                              |
|   |   |   |   | ■ | PRK14103            | trans-aconitate 2-methyltransferase                                                        |
| ◆ |   |   |   |   | FtsJ                | FtsJ-like methyltransferase                                                                |

Table S3 BLAST search of the hypothetical LaeA using AnLaeA (GeneBank: AAQ95166.1) as a query sequence in *A. flagrans* genome.

| Gene ID    | GeneBank   | Percent Identity | Query Cover | E value |
|------------|------------|------------------|-------------|---------|
| DFL_005107 | RVD86853.1 | 48.47%           | 76%         | 6e-96   |
| DFL_000451 | RVD89443.1 | 37.15%           | 76%         | 1e-57   |
| DFL_006623 | RVD82190.1 | 37.92%           | 78%         | 5e-55   |
| DFL_007594 | RVD83196.1 | 35.26%           | 81%         | 2e-53   |
| DFL_006144 | RVD84392.1 | 31.76%           | 84%         | 2e-51   |
| DFL_006658 | RVD82225.1 | 34.00%           | 78%         | 4e-48   |
| DFL_006575 | RVD82141.1 | 33.77%           | 78%         | 1e-47   |
| DFL_002107 | RVD87904.1 | 31.80%           | 81%         | 4e-45   |
| DFL_003019 | RVD88847.1 | 27.57%           | 71%         | 7e-30   |
| DFL_001934 | RVD87721.1 | 25.29%           | 43%         | 3e-08   |



Table S4 The predicted and tallied physiochemical properties of AfLaeA, and three methyltransferase in *A. flagrans*.

| Gene Name  | Exon Number | Intron Number | Number of Amino Acids (aa) | Molecular Weight (kDa) | Subcellular localization | Reference  |
|------------|-------------|---------------|----------------------------|------------------------|--------------------------|------------|
| AnLaeA     | -           | -             | 374                        | 43.0                   | Nuclear, Cytoplasmic     | (2)        |
| AfLaeA     | 7           | 6             | 362                        | 41.491                 | Nuclear, Cytoplasmic     | This study |
| DFL_000451 | 11          | 10            | 340                        | 38.530                 | Cytoplasmic              | This study |
| DFL_006623 | 12          | 11            | 367                        | 40.620                 | Cytoplasmic              | This study |
| DFL_007594 | 9           | 8             | 353                        | 40.659                 | Cytoplasmic              | This study |

Table S5. Statistics of reads and mapping rate for the WT strain and *ΔAflaeA* (KO) strains at different time points.

| Sample   | Total reads | Total mapped     | Multiple mapped | Uniquely mapped  |
|----------|-------------|------------------|-----------------|------------------|
| KO_T3d_3 | 43429426    | 41931260(96.55%) | 718954(1.66%)   | 41212306(94.89%) |
| KO_T3d_2 | 42592746    | 40677347(95.5%)  | 788589(1.85%)   | 39888758(93.65%) |
| KO_T3d_1 | 50354928    | 48246991(95.81%) | 905301(1.8%)    | 47341690(94.02%) |
| WT_T3d_3 | 48099230    | 45830147(95.28%) | 1247476(2.59%)  | 44582671(92.69%) |
| WT_T3d_2 | 42921210    | 41080883(95.71%) | 1016245(2.37%)  | 40064638(93.34%) |
| WT_T3d_1 | 56412094    | 53881198(95.51%) | 1480983(2.63%)  | 52400215(92.89%) |
| KO_T7d_3 | 62833816    | 60393778(96.12%) | 1243743(1.98%)  | 59150035(94.14%) |
| KO_T7d_2 | 60455376    | 58187374(96.25%) | 1030325(1.7%)   | 57157049(94.54%) |
| KO_T7d_1 | 59156000    | 57426141(97.08%) | 1080771(1.83%)  | 56345370(95.25%) |
| WT_T7d_3 | 64070156    | 61837821(96.52%) | 1529355(2.39%)  | 60308466(94.13%) |
| WT_T7d_2 | 48599186    | 46912912(96.53%) | 1095932(2.26%)  | 45816980(94.28%) |
| WT_T7d_1 | 50418794    | 48597415(96.39%) | 1182796(2.35%)  | 47414619(94.04%) |

Table S6 Relative content of unknown peaks in  $\Delta AfLaeA$  and  $\Delta AfLaeA^{RC}$  strains compared with WT (Top 20).

| $\Delta AfLaeA$            |           |           |          |                           | $\Delta AfLaeA^{RC}$      |          |          |          |                                |
|----------------------------|-----------|-----------|----------|---------------------------|---------------------------|----------|----------|----------|--------------------------------|
| Predict molecular formula  | Calc. MW  | m/z       | RT [min] | Ratio $\Delta AfLaeA$ /WT | Predict molecular formula | Calc. MW | m/z      | RT [min] | Ratio $\Delta AfLaeA^{RC}$ /WT |
| $C_{20}H_{30}N_2O_2$       | 330.23056 | 331.23784 | 17.007   | 0.001771287               | $C_{28}H_{36}N_4O$        | 444.2885 | 445.2958 | 17.186   | 1204.756                       |
| $C_{20}H_{32}N_2O$         | 316.25142 | 317.25869 | 16.951   | 0.002223715               | $C_{28}H_{36}N_4O$        | 444.2887 | 445.2959 | 17.095   | 918.1334                       |
| $C_{10}H_{11}NOS$          | 193.05616 | 194.06344 | 16.929   | 0.003421061               | $C_{20}H_{26}N_6O_4$      | 414.2022 | 415.2095 | 14.138   | 808.3236                       |
| $C_8H_{11}N_3O_3$          | 197.08009 | 198.08737 | 16.677   | 0.005762016               | $C_{28}H_{36}N_4O$        | 444.2886 | 445.2959 | 15.75    | 588.2408                       |
| $C_{17}H_{14}O_7$          | 330.07386 | 331.08114 | 15.558   | 0.006608889               | $C_9H_{23}N_4O_3P$        | 266.1498 | 267.157  | 12.46    | 558.5093                       |
| $C_{18}H_{15}N_3O$         | 289.12098 | 290.12826 | 16.977   | 0.007809357               | $C_8H_{10}N_8O_2S$        | 282.0656 | 283.0728 | 0.522    | 549.7278                       |
| $C_{12}H_{27}NO$           | 201.20934 | 202.21662 | 15.651   | 0.008059129               | $C_{20}H_{34}N_2O_3$      | 350.2568 | 351.264  | 11.036   | 487.2139                       |
| $C_{16}H_{10}O_6$          | 298.04755 | 299.05483 | 16.091   | 0.008960139               | $C_{16}H_{27}N_4OP$       | 322.1939 | 323.2012 | 15.686   | 316.4279                       |
| $C_{16}H_{17}N_3$          | 251.14197 | 252.14925 | 15.65    | 0.009700595               | $C_{14}H_{33}N_6O_2P$     | 348.2412 | 349.2484 | 11.677   | 316.3023                       |
| $C_{10}H_{11}NO_2S_2$      | 241.02307 | 242.03035 | 15.739   | 0.010699206               | $C_4H_6N_2O$              | 98.04851 | 99.05572 | 13.616   | 314.4503                       |
| $C_{19}H_{30}N_2O$         | 302.2364  | 303.24368 | 16.944   | 0.01240193                | $C_7H_6N_6OS$             | 222.0329 | 223.0402 | 10.416   | 294.5013                       |
| $C_{14}H_{32}N_6O_3S$      | 364.22448 | 365.2316  | 16.916   | 0.013988137               | $C_{18}H_{33}N_4O_4P$     | 400.2231 | 401.2303 | 19.291   | 271.6765                       |
| $C_6H_5N_7O$               | 191.05591 | 192.06319 | 3.362    | 0.014213441               | $C_{14}H_{33}N_6OP$       | 332.2461 | 333.2534 | 0.678    | 271.3978                       |
| $C_{28}H_{28}N_{10}O_{11}$ | 680.19516 | 681.20243 | 15.555   | 0.014471258               | $C_{20}H_{34}N_2O_3$      | 350.2567 | 351.2639 | 0.85     | 269.5328                       |
| $C_9H_{21}N_4OP$           | 232.14446 | 233.15174 | 15.778   | 0.016945244               | $C_6H_{19}N_7OS$          | 237.1364 | 238.1437 | 0.667    | 258.3884                       |
| $C_{20}H_{28}O_3$          | 316.2039  | 317.21128 | 18.564   | 0.017027088               | $C_{11}H_{21}N_4O_2P$     | 272.1391 | 273.1464 | 17.081   | 255.7101                       |
| $C_{14}H_{31}NO_3$         | 261.2303  | 262.23757 | 16.101   | 0.017126961               | $C_{11}H_{17}N_6O_2P$     | 296.116  | 297.1233 | 10.603   | 246.8178                       |
| $C_{20}H_{14}N_2O_2$       | 314.10519 | 315.11247 | 16.191   | 0.017209785               | $C_4H_6N_2O$              | 98.04852 | 99.05572 | 13.841   | 245.8484545                    |
| $C_{11}H_{13}N_6OP$        | 276.0897  | 277.09698 | 16.83    | 0.018492191               | $C_{20}H_{28}N_3P_3$      | 403.1507 | 404.1579 | 10.403   | 239.3218023                    |
| $C_{23}H_{35}N_3O_3$       | 401.26772 | 402.275   | 16.672   | 0.019293874               | $C_{20}H_{34}N_2O_3$      | 350.2567 | 351.2641 | 0.638    | 221.8894215                    |

Table S7 Presence and effects of *LaeA* in the fungal kingdom.

| Fungal groups             | Species                                 | Function |   |   |    |          | Reference |
|---------------------------|-----------------------------------------|----------|---|---|----|----------|-----------|
|                           |                                         | SM       | G | D | V  | SP       |           |
| Ascomycota                | <i>Aspergillus nidulans</i>             | SM       | - | D | -  | -        | (3, 4)    |
|                           | <i>Aspergillus fumigatus</i>            | SM       | - | D | V  | -        | (5, 6)    |
|                           | <i>Aspergillus oryzae</i>               | SM       | - | D | -  | -        | (7, 8)    |
|                           | <i>Aspergillus flavus</i>               | SM       | - | D | V  | SP       | (9, 10)   |
|                           | <i>Aspergillus carbonarius</i>          | SM       | - | D | V  | -        | (11)      |
|                           | <i>Aspergillus luchuensis</i>           | SM       | - | D | -  | -        | (12)      |
|                           | <i>Aspergillus niger</i>                | SM       | G | D | -  | -        | (13, 14)  |
|                           | <i>Aspergillus terreus</i>              | SM       | - | D | -  | -        | (15, 16)  |
|                           | <i>Aspergillus ochraceus</i>            | SM       | - | D | V  | -        | (17)      |
|                           | <i>Aspergillus versicolor</i>           | SM       | - | D | -  | -        | (18)      |
|                           | <i>Aspergillus pachycristatus</i>       | SM       | - | D | -  | -        | (19)      |
|                           | <i>Aspergillus pseudoterreus</i>        | SM       | - | D | -  | -        | (20)      |
|                           | <i>Aspergillus fumisynnematus</i>       | SM       | - | D | -  | -        | (21)      |
|                           | <i>Monascus pilosus</i>                 | SM       | - | D | -  | -        | (22)      |
|                           | <i>Monascus ruber</i>                   | SM       | G | D | -  | -        | (23)      |
|                           | <i>Monascus purpureus</i>               | SM       | - | D | -  | -        | (24)      |
|                           | <i>Trichoderma atroviride</i>           | SM       | G | D | -  | -        | (25)      |
|                           | <i>Trichoderma reesei</i>               | SM       | G | D | -  | SP       | (26, 27)  |
|                           | <i>Trichoderma afroharzianum</i>        | SM       | - | - | -  | -        | (28)      |
|                           | <i>Trichoderma longibrachiatum SMF2</i> | SM       | G | D | -  | SP       | (29)      |
|                           | <i>Penicillium Brocae</i> HDN-12-143    | SM       | - | - | -  | -        | (30)      |
|                           | <i>Penicillium dipodomvis</i> YJ-11     | SM       | - | - | -  | -        | (31)      |
|                           | <i>Penicillium digitatum</i>            | SM       | - | D | -  | -        | (32)      |
|                           | <i>Penicillium chrysogenum</i>          | SM       | G | D | -  | -        | (33, 34)  |
|                           | <i>Penicillium citrinum</i>             | SM       | - | D | -  | -        | (35, 36)  |
|                           | <i>Penicillium expansum</i>             | SM       | G | D | V  | -        | (37, 38)  |
|                           | <i>Penicillium oxalicum</i>             | SM       | - | D | -  | -        | (39)      |
|                           | <i>Fusarium verticillioides</i>         | SM       | - | D | V  | -        | (40)      |
|                           | <i>Fusarium graminearum</i>             | SM       | G | D | V  | -        | (41)      |
|                           | <i>Fusarium oxysporum</i>               | SM       | G | D | V  | -        | (42)      |
|                           | <i>Fusarium fujikuroi</i>               | SM       | - | D | V  | -        | (43)      |
|                           | <i>Cladosporium fulvum</i>              | SM       | G | D | V  | -        | (44)      |
|                           | <i>Beauveria bassiana</i>               | SM       | - | - | V  | SP       | (45)      |
|                           | <i>Cordyceps militaris</i>              | SM       | - | - | -  | -        | (46)      |
|                           | <i>Botrytis cinerea</i>                 | SM       | - | D | V  | SP       | (47)      |
|                           | <i>Pestalotiopsis microspora</i>        | SM       | G | D | V  | -        | (48)      |
|                           | <i>Valsa mali</i>                       | SM       | G | D | V  | -        | (49)      |
|                           | <i>Cochliobolus heterostrophus</i>      | SM       | G | D | V  | -        | (50)      |
|                           | <i>Neurospora crassa</i>                | SM       | G | D | V  | -        | (51)      |
|                           | <i>Chaetomium globosum</i>              | SM       | G | D | V  | -        | (52)      |
|                           | <i>Dothistroma septosporum</i>          | SM       | G | D | V  | -        | (53)      |
|                           | <i>Alternaria alternata</i>             | SM       | G | D | V  | -        | (54, 55)  |
|                           | <i>Alternaria alstroemeria</i>          | SM       | - | - | V  | -        | (56)      |
| <i>Epichloe festucae</i>  | SM                                      | G        | D | V | SP | (57, 58) |           |
| <i>Magnaporthe oryzae</i> | SM                                      | -        | D | V | -  | (59)     |           |
| <i>Pyricularia oryzae</i> | SM                                      | -        | - | - | -  | (60)     |           |
| Basidiomycete             | <i>Pleurotus ostreatus</i>              | SM       | G | D | -  | SP       | (61)      |
|                           | <i>Ganoderma lingzhi</i>                | SM       | G | D | -  | -        | (62)      |
|                           | <i>Coprinopsis cinerea</i>              | SM       | G | D | -  | -        | (63)      |

SM: secondary metabolite; G: Growth; D: fungal development; V: virulence; SP: secreted protein

Table S8 PCR primer sets used in this study.

| Target gene       | Sequence ID                  | Primers          | Primer sequences (5'-3') <sup>a</sup>                | Uses                                           |
|-------------------|------------------------------|------------------|------------------------------------------------------|------------------------------------------------|
| <i>AfLaeA</i>     | DFL_005107<br>(EVM02G003030) | Ko5107-up-for    | ccgggtaccgagctcgaattcTTCGTTACCTTTTTTGCTTATTCT        | Amplify the 5' flank of <i>AfLaeA</i> gene     |
|                   |                              | Ko5107-up-rev    | ctctgTCAGACCAATTCCCCGGAA                             |                                                |
|                   |                              | Ko5107-hyg-for   | gggaattggtctgaCAGAAGATGATATTGAAGGAGCATT              | Amplify the <i>hph</i> cassette                |
|                   |                              | Ko5107-hyg-rev   | attgAAAGAAGGATTACCTCTAAACAAGTGTACC                   |                                                |
|                   |                              | Ko5107-down-for  | gaggtaatccttcttCAATTATTAACAACACTACGGCTCGC            | Amplify the 3' flank of <i>AfLaeA</i> gene     |
|                   |                              | Ko5107-down-rev  | gtactgagagtgcaccatgTTGGAAAGGTGGGGAATTAGG             |                                                |
| <i>DFL_000451</i> | DFL_000451<br>(EVM05G004610) | Ko0451-up-for    | ccgggtaccgagctcgaattcCCCCAACGGTTCCTTTTGC             | Amplify the 5' flank of <i>DFL_000451</i> gene |
|                   |                              | Ko0451-up-rev    | catctctgTGTGTCCAGTGCGGTTTGTGCG                       |                                                |
|                   |                              | Ko0451-hyg-for   | cactggacacaCAGAAGATGATATTGAAGGAGCATT                 | Amplify the <i>hph</i> cassette                |
|                   |                              | Ko0451-hyg-rev   | ccaggagataAAAGAAGGATTACCTCTAAACAAGTGTACC             |                                                |
|                   |                              | Ko0451-down-for  | tcctcttTATCCTCCTGGTATCATTCAATATTAATAA                | Amplify the 3' flank of <i>DFL_000451</i> gene |
|                   |                              | Ko0451-down-rev  | gtactgagagtgcaccatgTATGGTGCAAAGTAAATTGGTTTGA         |                                                |
| <i>DFL_006623</i> | DFL_006623<br>(EVM03G001000) | Ko6623-up-for    | ccgggtaccgagctcgaattcTTTTGCGGTATATCTACAAATTCTAGTATAT | Amplify the 5' flank of <i>DFL_006623</i> gene |
|                   |                              | Ko6623-up-rev    | tcatctctgGGCTATAGACTTTTTTCTGGGGC                     |                                                |
|                   |                              | Ko6623-hyg-for   | gtctatagccCAGAAGATGATATTGAAGGAGCATT                  | Amplify the <i>hph</i> cassette                |
|                   |                              | Ko6623-hyg-rev   | ccctatcatcgagaaagtAAAGAAGGATTACCTCTAAACAAGTGTACC     |                                                |
|                   |                              | Ko6623-down-for  | ACTTTTCTCCGATGATAGGGTCC                              | Amplify the 3' flank of <i>DFL_006623</i> gene |
|                   |                              | Ko6623-down-rev  | gtactgagagtgcaccatgCCAACCTCAAAGGAAAAGGATTAAA         |                                                |
| <i>DFL_007594</i> | DFL_007594<br>(EVM03G010660) | Ko7594-up-for    | ccgggtaccgagctcgaattcGCTTCTTTTCGACTGTTGAAACC         | Amplify the 5' flank of <i>DFL_007594</i> gene |
|                   |                              | Ko7594-up-rev    | tctgCGATTTTAGAATAGGGAAAACCT                          |                                                |
|                   |                              | Ko7594-hyg-for   | ccctattctaaatcgCAGAAGATGATATTGAAGGAGCATT             | Amplify the <i>hph</i> cassette                |
|                   |                              | Ko7594-hyg-rev   | ggaaggataatggagagactAAAGAAGGATTACCTCTAAACAAGTGTACC   |                                                |
|                   |                              | Ko7594-down-for  | AGTCTCTCCATTATCCTTCCAAATCA                           | Amplify the 3' flank of <i>DFL_007594</i> gene |
|                   |                              | Ko7594-down-rev  | gtactgagagtgcaccatgGAAAATCGCACCGGGTAGTTG             |                                                |
| <i>AfLaeA</i>     | DFL_005107<br>(EVM02G003030) | RC-5107-gpdp-for | ccgggtaccgagctcgaattcGATCACCTCGGCGGGGTC              | Amplify the promoter of <i>Afgpd</i> gene      |
|                   |                              | RC-5107-gpdp-rev | ggtagactctgcatTTTGAATTATTGACTTTTGTGCGAGG             |                                                |
|                   |                              | RC-5107-cds-for  | caaaATGACAGAAGTCTACCAATACGCTCA                       | Amplify the CDS fragment of <i>AfLaeA</i> gene |
|                   |                              | RC-5107-cds-rev  | ttgctcaccatAGGGCGTCTGGGCAATCCA                       |                                                |
|                   |                              | RC-5107-egfp-for | cgacgcctATGGTGAGCAAGGGCGAGG                          | Amplify the <i>EGFP</i> fragment               |
|                   |                              | RC-5107-egfp-rev | gcttcacgctgggaattTACTTGTACAGCTCGTCCATGCC             |                                                |
|                   |                              | RC-5107-gpdT-for | ATAATTCCCCAGCGTGAAGCT                                | Amplify the terminator of <i>Afgpd</i> gene    |
|                   |                              | RC-5107-gpdT-rev | gcctcatgctATGTGAAAAGGGATTTGATCG                      |                                                |
|                   |                              | RC-5107-nrsr-for | ttccacatGACATGGAGGCCAGAATACC                         |                                                |

|                 |                                          |                  |                                                 |                                                   |
|-----------------|------------------------------------------|------------------|-------------------------------------------------|---------------------------------------------------|
|                 |                                          | RC-5107-nrsr-rev | gtactgagagtgccacatgCAGTATAGCGACCAGCATTCA        |                                                   |
| <i>AfvosA</i>   | DFL_008845<br>(EVM00G008390)             | AD-8390-for      | gagtggccattatggATGCAAATCATTCTTTGCAGA            | Amplify the CDS fragment of <i>AfvosA</i> gene    |
|                 |                                          | AD-8390-rev      | gccgacatgtttttTCATGTAGCATAAGTTTGGCTAACAG        |                                                   |
| <i>AfveA</i>    | DFL_000190<br>(EVM05G002000)             | AD-5070-for      | gagtggccattatggATGGCCGACCGTTTTATCCC             | Amplify the CDS fragment of <i>AfveA</i> gene     |
|                 |                                          | AD-5070-rev      | gccgacatgtttttTTACATGTCCATAGTATCACCTGG          |                                                   |
| <i>AfvelB</i>   | DFL_008938<br>(EVM00G009330)             | AD-9330-for      | gagtggccattatggATGTATACTACAAGCTCTCGGGACC        | Amplify the CDS fragment of <i>AfvelB</i> gene    |
|                 |                                          | AD-9330-rev      | gccgacatgtttttTCAGTAATCGTCATCATCGTCCTG          |                                                   |
| <i>AfvelC</i>   | DFL_004053<br>(EVM02G013760)             | AD-3760-for      | gagtggccattatggATGATGTCTCCTAGGCCTCCACC          | Amplify the CDS fragment of <i>AfvelC</i> gene    |
|                 |                                          | AD-3760-rev      | gccgacatgtttttTTATGCTTTCCTGCGACGTTT             |                                                   |
| <i>AfpacC</i>   | DFL_007387<br>(EVM03G008580)             | AD-8580-for      | gagtggccattatggATGGATAGCACGGAACCACG             | Amplify the CDS fragment of <i>AfpacC</i> gene    |
|                 |                                          | AD-8580-rev      | gccgacatgtttttTTATGCGGATGTTTCGACAGAC            |                                                   |
| <i>AfbriA</i>   | DFL_001688<br>(EVM01G002650)             | AD-2650-for      | gagtggccattatggATGTCCCATCATAACATTCACATGG        | Amplify the CDS fragment of <i>AfbriA</i> gene    |
|                 |                                          | AD-2650-rev      | gccgacatgtttttTCAATGCTCAAGCTTGATCCC             |                                                   |
| <i>AfkapA</i>   | DFL_007032<br>(EVM03G005070)             | AD-7032-for      | catggaggccgaattcccgggATGGCCGACCGTTTTATCCC       | Amplify the CDS fragment of <i>AfkapA</i> gene    |
|                 |                                          | AD-7032-rev      | gcaggtcgacggatccccgggTTACATGTCCATAGTATCACCTGG   |                                                   |
| <i>AffphA</i>   | DFL_002824<br>(EVM01G014010)             | AD-4010-for      | gagtggccattatggATGGAATCTTCAATATTTGTCACAA        | Amplify the CDS fragment of <i>AffphA</i> gene    |
|                 |                                          | AD-4010-rev      | gccgacatgtttttTCACCCTATGTGTGTCTGGAAGG           |                                                   |
| <i>AfLaeA</i>   | DFL_005107<br>(EVM02G003030)             | AD-5107-for      | catggaggccgaattcccgggATGACAGAAGTCTACCAATACGCTCA | Amplify the CDS fragment of <i>AfLaeA</i> gene    |
|                 |                                          | AD-5107-rev      | gcaggtcgacggatccccgggTTAAGGGCGTCGGGCAAT         |                                                   |
|                 |                                          | BD-5107-for      | catggaggccgaattcccgggATGACAGAAGTCTACCAATACGCTCA |                                                   |
|                 |                                          | BD-5107-rev      | gcaggtcgacggatccccgggTTAAGGGCGTCGGGCAAT         |                                                   |
| <i>AfLaeA</i>   | DFL_005107<br>(EVM02G003030)             | RC-5107-P-for    | ccgggtaccgagctcgaattcGTTTCTATCATGAGCATGTATCCATG | Amplify the 5' flank (2 kb) of <i>AfLaeA</i> gene |
|                 |                                          | RC-5107-P-rev    | gtcatTCAGACCAATTCCTCCGGAA                       |                                                   |
|                 |                                          | RC-5107-CDS-for  | ggggaattggctgaATGACAGAAGTCTACCAATACGCTCA        | Amplify the CDS fragment of <i>AfLaeA</i> gene    |
|                 |                                          | RC-5107-CDS-rev  | taattgTTAAGGGCGTCGGGCAAT                        |                                                   |
|                 |                                          | RC-5107-T-for    | cccgagcccttaaCAATTATTAACAACACTACGGCTCGC         | Amplify the 3' flank (1 kb) of <i>AfLaeA</i> gene |
|                 |                                          | RC-5107-T-rev    | gcctccatgtcGAAGGAAAAGGGTCAAATTTGTCT             |                                                   |
|                 |                                          | RC-5107-NRS-for  | tttccctcGACATGGAGGCCAGAAATACC                   | Amplify the <i>NRS<sup>R</sup></i> cassette       |
| RC-5107-NRS-rev | gtactgagagtgccacatgCAGTATAGCGACCAGCATTCA |                  |                                                 |                                                   |

<sup>a</sup>The primer sequence consistent with the vector is indicated by lowercase letters.

Table S9 Real time PCR primer sets used in this study.

| Target gene   | Sequence ID                  | Primers                | Primer sequences (5'-3') |
|---------------|------------------------------|------------------------|--------------------------|
| <i>AfGpd</i>  | DFL_000198<br>(EVM05G002080) | <i>AfGpd</i> -for      | CGAGAAGCCCCGCAAGT        |
|               |                              | <i>AfGpd</i> -rev      | AAAGGTGTCGGTCAAAGCAAT    |
| <i>AfLaeA</i> | DFL_005107<br>(EVM02G003030) | RT- <i>AfLaeA</i> -for | TCTGGTAAACCACTTCGGTAC    |
|               |                              | RT- <i>AfLaeA</i> -rev | GTGCGATGCAAAGGGAC        |
| <i>artA</i>   | DFL_002601<br>(EVM01G011780) | RT- <i>artA</i> -for   | GCTCCCACATTTCCACCT       |
|               |                              | RT- <i>artA</i> -rev   | GGATTATCGGCATTCTGACTT    |
| <i>artB</i>   | DFL_002602<br>(EVM01G011790) | RT- <i>artB</i> -for   | GCAGTTCAAACGCAGAGC       |
|               |                              | RT- <i>artB</i> -rev   | ATGGAAGAGCCGCAAAG        |
| <i>artC</i>   | DFL_002603<br>(EVM01G011800) | RT- <i>artC</i> -for   | GTCCACGGAGGAAATAATCG     |
|               |                              | RT- <i>artC</i> -rev   | CTCGGAGAACTCGTACTTATCAA  |
| <i>artD</i>   | DFL_002604<br>(EVM01G011810) | RT- <i>artD</i> -for   | TACTTGATGAGCCTCCACG      |
|               |                              | RT- <i>artD</i> -rev   | TTAGAAGACGCCCGATGA       |
| <i>artE</i>   | DFL_002606<br>(EVM01G011830) | RT- <i>artE</i> -for   | TCACAAGATGGGCTCGGATTG    |
|               |                              | RT- <i>artE</i> -rev   | TAGCAGCGACGCCAGCAGT      |
| <i>artR</i>   | DFL_002600<br>(EVM01G011760) | RT- <i>artR</i> -for   | CGAGACTTTGTGGGAGGA       |
|               |                              | RT- <i>artR</i> -rev   | ACTGTGGGACGTGATTGTG      |

## Reference

1. Yu X, Hu X, Pop M, Wernet N, Kirschhöfer F, Brenner-Weiß G, Keller J, Bunzel M, Fischer R. 2021. Fatal attraction of *Caenorhabditis elegans* to predatory fungi through 6-methyl-salicylic acid. *Nat Commun* 12:5462.
2. Bayram O, Krappmann S, Ni M, Bok JW, Helmstaedt K, Valerius O, Braus-Stromeyer S, Kwon NJ, Keller NP, Yu JH, Braus GH. 2008. VelB/VeA/LaeA complex coordinates light signal with fungal development and secondary metabolism. *Science* 320:1504-1506.
3. Bok JW, Noordermeer D, Kale SP, Keller NP. 2006. Secondary metabolic gene cluster silencing in *Aspergillus nidulans*. *Mol Microbiol* 61:1636-1645.
4. Sarikaya Bayram O, Bayram O, Valerius O, Park HS, Irniger S, Gerke J, Ni M, Han KH, Yu JH, Braus GH. 2010. LaeA control of velvet family regulatory proteins for light-dependent development and fungal cell-type specificity. *PLoS Genet* 6:e1001226.
5. Ben-Ami R, Lewis RE, Leventakos K, Kontoyiannis DP. 2009. *Aspergillus fumigatus* inhibits angiogenesis through the production of gliotoxin and other secondary metabolites. *Blood* 114:5393-5399.
6. Lim FY, Hou Y, Chen Y, Oh JH, Lee I, Bugni TS, Keller NP. 2012. Genome-based cluster deletion reveals an endocrocin biosynthetic pathway in *Aspergillus fumigatus*. *Appl Environ Microbiol* 78:4117-4125.

7. Alshannaq AF, Gibbons JG, Lee MK, Han KH, Hong SB, Yu JH. 2018. Controlling aflatoxin contamination and propagation of *Aspergillus flavus* by a soy-fermenting *Aspergillus oryzae* strain. *Sci Rep* 8:16871.
8. Oda K, Kobayashi A, Ohashi S, Sano M. 2011. *Aspergillus oryzae laeA* regulates kojic acid synthesis genes. *Biosci Biotechnol Biochem* 75:1832-4.
9. Amaike S, Affeldt KJ, Yin WB, Franke S, Choithani A, Keller NP. 2013. The bZIP protein MeaB mediates virulence attributes in *Aspergillus flavus*. *PLoS One* 8:e74030.
10. Lv Y, Lv A, Zhai H, Zhang S, Li L, Cai J, Hu Y. 2018. Insight into the global regulation of *laeA* in *Aspergillus flavus* based on proteomic profiling. *Int J Food Microbiol* 284:11-21.
11. Maor U, Barda O, Sadhasivam S, Bi Y, Levin E, Zakin V, Prusky DB, Sionov E. 2021. Functional roles of *LaeA*, polyketide synthase, and glucose oxidase in the regulation of ochratoxin A biosynthesis and virulence in *Aspergillus carbonarius*. *Mol Plant Pathol* 22:117-129.
12. Kadooka C, Nakamura E, Mori K, Okutsu K, Yoshizaki Y, Takamine K, Goto M, Tamaki H, Futagami T. 2020. *LaeA* controls citric acid production through regulation of the citrate exporter-encoding *cexA* gene in *Aspergillus luchuensis* mut. *kawachii*. *Appl Environ Microbiol* 86: e01950-19.
13. Niu J, Arentshorst M, Nair PD, Dai Z, Baker SE, Frisvad JC, Nielsen KF, Punt PJ, Ram AF. 2015. Identification of a classical mutant in the industrial host *Aspergillus niger* by systems genetics: *LaeA* is required for citric acid production and regulates the formation of some secondary metabolites. *G3 (Bethesda)* 6:193-204.
14. Zhang M, Yang Y, Li L, Liu S, Xue X, Gao Q, Wang D, Zhang Y, Zhang J. 2022. *LaeA* regulates morphological development and ochratoxin A biosynthesis in *Aspergillus niger*. *Mycotoxin Res* 38:221-229.
15. Yao G, Chen X, Han Y, Zheng H, Wang Z, Chen J. 2022. Development of versatile and efficient genetic tools for the marine-derived fungus *Aspergillus terreus* RA2905. *Curr Genet* 68:153-164.
16. Wang B, Li X, Tabudravu J, Wang S, Deng H, Pan L. 2021. The chemical profile of activated secondary metabolites by overexpressing *LaeA* in *Aspergillus niger*. *Microbiol Res* 248:126735.
17. Wang G, Zhang H, Wang Y, Liu F, Li E, Ma J, Yang B, Zhang C, Li L, Liu Y. 2019. Requirement of *LaeA*, *VeA*, and *VelB* on asexual development, ochratoxin A biosynthesis, and fungal virulence in *Aspergillus ochraceus*. *Front Microbiol* 10:2759.
18. He T, Wang YD, Du LQ, Li FR, Hu QF, Cheng GG, Wang WG. 2020. Overexpression of global regulator *LaeA* induced secondary metabolite production in *Aspergillus versicolor* 0312. *Rec Nat Prod* 14:387-394.



19. Lan N, Yue Q, An Z, Bills GF. 2020. Apc.LaeA and Apc.VeA of the velvet complex govern secondary metabolism and morphological development in the echinocandin-producing fungus *Aspergillus pachycristatus*. *J Ind Microbiol Biotechnol* 47:155-168.
20. Pomraning KR, Dai Z, Munoz N, Kim YM, Gao Y, Deng S, Lemmon T, Swita MS, Zucker JD, Kim J, Mondo SJ, Panisko E, Burnet MC, Webb-Robertson BM, Hofstad B, Baker SE, Burnum-Johnson KE, Magnuson JK. 2022. Itaconic acid production is regulated by *LaeA* in *Aspergillus pseudoterreus*. *Metab Eng Commun* 15:e00203.
21. Hong EJ, Kim NK, Lee D, Kim WG, Lee I. 2015. Overexpression of the *laeA* gene leads to increased production of cyclopiazonic acid in *Aspergillus fumisynnematus*. *Fungal Biol* 119:973-983.
22. Lee SS, Lee JH, Lee I. 2013. Strain improvement by overexpression of the *laeA* gene in *Monascus pilosus* for the production of monascus-fermented rice. *J Microbiol Biotechnol* 23:959-965.
23. Liu QP, Cai L, Shao YC, Zhou YX, Li M, Wang XH, Chen FS. 2016. Inactivation of the global regulator *LaeA* in *Monascus ruber* results in a species-dependent response in sporulation and secondary metabolism. *Fungal Biol* 120:297-305.
24. Zhang C, Zhang H, Zhu Q, Hao S, Chai S, Li Y, Jiao Z, Shi J, Sun B, Wang C. 2020. Overexpression of global regulator *LaeA* increases secondary metabolite production in *Monascus purpureus*. *Appl Microbiol Biotechnol* 104:3049-3060.
25. Karimi Aghcheh R, Druzhinina IS, Kubicek CP. 2013. The putative protein methyltransferase LAE1 of *Trichoderma atroviride* is a key regulator of asexual development and mycoparasitism. *PLoS One* 8:e67144.
26. Karimi-Aghcheh R, Bok JW, Phatale PA, Smith KM, Baker SE, Lichius A, Omann M, Zeilinger S, Seiboth B, Rhee C, Keller NP, Freitag M, Kubicek CP. 2013. Functional analyses of *Trichoderma reesei* LAE1 reveal conserved and contrasting roles of this regulator. *G3 (Bethesda)* 3:369-378.
27. Fekete E, Karaffa L, Karimi Aghcheh R, Németh Z, Fekete E, Orosz A, Pahlcsek M, Stágel A, Kubicek CP. 2014. The transcriptome of *lae1* mutants of *Trichoderma reesei* cultivated at constant growth rates reveals new targets of LAE1 function. *BMC Genomics* 15:447.
28. Ding Z, Wang X, Kong FD, Huang HM, Zhao YN, Liu M, Wang ZP, Han J. 2020. Overexpression of global regulator *Talae1* leads to the discovery of new antifungal polyketides from endophytic fungus *Trichoderma afroharzianum*. *Front Microbiol* 11:622785.

29. Shi JC, Shi WL, Zhou YR, Chen XL, Zhang YZ, Zhang X, Zhang WX, Song XY. 2020. The Putative methyltransferase TILAE1 is involved in the regulation of peptaibols production in the biocontrol fungus *Trichoderma longibrachiatum* SMF2. *Front Microbiol* 11:1267.
30. Wang L, Zhang X, Zhang K, Zhang X, Zhu T, Che Q, Zhang G, Li D. 2020. Overexpression of global regulator *PbrlaeA* leads to the discovery of new polyketide in fungus *Penicillium Brocae* HDN-12-143. *Front Chem* 8:270.
31. Yu J, Han H, Zhang XY, Ma CT, Sun CX, Che Q, Gu QQ, Zhu TJ, Zhang GJ, Li DH. 2019. Discovery of two new sorbicillinoids by overexpression of the global regulator *LaeA* in a marine-derived fungus *Penicillium dipodomyis* YJ-11. *Mar Drugs* 17:446.
32. Zhu CY, Wang YY, Hu X, Lei MY, Wang MS, Zeng JW, Li HY, Liu ZY, Zhou T, Yu DL. 2020. Involvement of *LaeA* in the regulation of conidia production and stress responses in *Penicillium digitatum*. *J Basic Microb* 60:82-88.
33. Martín JF. 2017. Key role of *LaeA* and velvet complex proteins on expression of  $\beta$ -lactam and PR-toxin genes in *Penicillium chrysogenum*: cross-talk regulation of secondary metabolite pathways. *J Ind Microbiol Biotechnol* 44:525-535.
34. Vu TX, Vu HH, Nguyen GT, Vu HT, Mai LTD, Pham DN, Le DH, Nguyen HQ, Tran VT. 2019. A newly constructed *Agrobacterium*-mediated transformation system revealed the influence of nitrogen sources on the function of the *LaeA* regulator in *Penicillium chrysogenum*. *Fungal Biol* 123:830-842.
35. Xing W, Deng C, Hu C-H. 2010. Molecular cloning and characterization of the global regulator *LaeA* in *Penicillium citrinum*. *Biotechnology Letters* 32:1733-1737.
36. Baba S, Kinoshita H, Nihira T. 2012. Identification and characterization of *Penicillium citrinum* *VeA* and *LaeA* as global regulators for ML-236B production. *Curr Genet* 58:1-11.
37. Kumar D, Tannous J, Sionov E, Keller N, Prusky D. 2018. Apple intrinsic factors modulating the global regulator, *LaeA*, the patulin gene cluster and patulin accumulation during fruit colonization by *Penicillium expansum*. *Front Plant Sci* 9:1094.
38. Kumar D, Barad S, Chen Y, Luo XY, Tannous J, Dubey A, Matana NG, Tian SP, Li BQ, Keller N, Prusky D. 2017. *LaeA* regulation of secondary metabolism modulates virulence in *Penicillium expansum* and is mediated by sucrose. *Mol Plant Pathol* 18:1150-1163.

39. Zhang X, Zhu Y, Bao L, Gao L, Yao G, Li Y, Yang Z, Li Z, Zhong Y, Li F, Yin H, Qu Y, Qin Y. 2016. Putative methyltransferase *LaeA* and transcription factor *CreA* are necessary for proper asexual development and controlling secondary metabolic gene cluster expression. *Fungal Genet Biol* 94:32-46.
40. Butchko RAE, Brown DW, Busman M, Tudzynski B, Wiemann P. 2012. *Lae1* regulates expression of multiple secondary metabolite gene clusters in *Fusarium verticillioides*. *Fungal Genetics and Biology* 49:602-612.
41. Kim HK, Lee S, Jo SM, McCormick SP, Butchko RAE, Proctor RH, Yun SH. 2013. Functional roles of *FgLaeA* in controlling secondary metabolism, sexual development, and virulence in *Fusarium graminearum*. *PLoS One* 8:e68441.
42. Lopez-Berges MS, Schafer K, Hera C, Di Pietro A. 2014. Combinatorial function of velvet and *AreA* in transcriptional regulation of nitrate utilization and secondary metabolism. *Fungal Genet Biol* 62:78-84.
43. Wiemann P, Brown DW, Kleigrew K, Bok JW, Keller NP, Humpf HU, Tudzynski B. 2010. *FfVel1* and *FfLae1*, components of a velvet-like complex in *Fusarium fujikuroi*, affect differentiation, secondary metabolism and virulence. *Mol Microbiol* 77:972-994.
44. Griffiths S, Saccomanno B, de Wit P, Collemare J. 2015. Regulation of secondary metabolite production in the fungal tomato pathogen *Cladosporium fulvum*. *Fungal Genet Biol* 84:52-61.
45. Qin YQ, Ortiz-Urquiza A, Keyhani NO. 2014. A putative methyltransferase, *mtrA*, contributes to development, spore viability, protein secretion and virulence in the entomopathogenic fungus *Beauveria bassiana*. *Microbiol* 160:2526-2537.
46. Rachmawati R, Kinoshita H, Nihira T. 2018. Production of insect toxin beauvericin from entomopathogenic fungi *Cordyceps militaris* by heterologous expression of global regulator. *Agrivita* 40:177-184.
47. Wei Z, Shu D, Sun Q, Chen DB, Li ZM, Luo D, Yang J, Tan H. 2022. The *BcLAE1* is involved in the regulation of ABA biosynthesis in *Botrytis cinerea* TB-31. *Front Microbiol* 13:969499.
48. Akhberdi O, Zhang Q, Wang D, Wang HC, Hao XR, Liu YJ, Wei DS, Zhu XD. 2018. Distinct roles of Velvet complex in the development, stress tolerance, and secondary metabolism in *Pestalotiopsis microspora*, a Taxol Producer. *GENES* 9:164.
49. Feng YQ, Yin ZY, Wu YX, Xu LS, Du HX, Wang NN, Huang LL. 2020. *LaeA* controls virulence and secondary metabolism in apple canker pathogen *Valsa mali*. *Front Microbiol* 11:581203.

50. Wu DL, Oide S, Zhang N, Choi MY, Turgeon BG. 2012. ChLae1 and ChVel1 Regulate T-toxin production, virulence, oxidative stress response, and development of the maize pathogen *Cochliobolus heterostrophus*. *Plos Pathog* 8:e1002542.
51. Bayram OS, Dettmann A, Karahoda B, Moloney NM, Ormsby T, McGowan J, Cea-Sanchez S, Miralles-Duran A, Brancini GTP, Luque EM, Fitzpatrick DA, Canovas D, Corrochano LM, Doyle S, Selker EU, Seiler S, Bayram O. 2019. Control of development, secondary metabolism and light-dependent carotenoid biosynthesis by the Velvet complex of *Neurospora crassa*. *Genetics* 212:691-710.
52. Cheng M, Zhao SS, Lin CY, Song JZ, Yang Q. 2021. Requirement of LaeA for sporulation, pigmentation and secondary metabolism in *Chaetomium globosum*. *Fungal Biol* 125:305-315.
53. Chettri P, Bradshaw RE. 2016. LaeA negatively regulates dothistromin production in the pine needle pathogen *Dothistroma septosporum*. *Fungal Genet Biol* 97:24-32.
54. Estiarte N, Lawrence CB, Sanchis V, Ramos AJ, Crespo-Sempere A. 2016. LaeA and VeA are involved in growth morphology, asexual development, and mycotoxin production in *Alternaria alternata*. *Int J Food Microbiol* 238:153-164.
55. Takao K, Akagi Y, Tsuge T, Harimoto Y, Yamamoto M, Kodama M. 2016. The global regulator LaeA controls biosynthesis of host-specific toxins, pathogenicity and development of *Alternaria alternata* pathotypes. *J Gen Plant Pathol* 82:121-131.
56. Yin X, Han L, Zheng W, Cai L, Qin M, He Z, Kang J. 2022. Global regulatory factor AaLaeA upregulates the production of antitumor substances in the endophytic fungus *Alternaria alstroemeria*. *J Basic Microbiol* 62:1402-1414.
57. Rahnema M, Maclean P, Fleetwood DJ, Johnson RD. 2020. VelA and LaeA are key regulators of *Epichloe festucae* transcriptomic response during symbiosis with perennial ryegrass. *Microorganisms* 8:33.
58. Rahnema M, Maclean P, Fleetwood DJ, Johnson RD. 2019. The LaeA orthologue in *Epichloë festucae* is required for symbiotic interaction with *Lolium perenne*. *Fungal Genet Biol* 129:74-85.
59. Saha P, Ghosh S, Roy-Barman S. 2020. *MoLAEA* regulates secondary metabolism in *Magnaporthe oryzae*. *mSphere* 5: e00936-19.
60. Yun CS, Motoyama T, Osada H. 2017. Regulatory mechanism of mycotoxin tenuazonic acid production in *Pyricularia oryzae*. *ACS Chem Biol* 12:2270-2274.

61. Zhang G, Yan P, Leng DD, Shang L, Zhang CH, Wu ZW, Wang ZH. 2022. Functional roles of *LaeA*-like genes in fungal growth, cellulase activity, and secondary metabolism in *Pleurotus ostreatus*. *J Fungi* 8:902.
62. Luo Q, Li N, Xu JW. 2022. A methyltransferase *LaeA* regulates ganoderic acid biosynthesis in *Ganoderma lingzhi*. *Front Microbiol* 13: 1025983.
63. Tsunematsu Y, Takanishi J, Asai S, Masuya T, Nakazawa T, Watanabe K. 2019. Genomic mushroom hunting decrypts coprinoferrin, a siderophore secondary metabolite vital to fungal cell development. *Org Lett* 21:7582-7586.
